# Supplementary material for: Expression Profiles Reveal Involvement of VEGF, IGF1, BIRC5, and MMP1 in Vulvar Carcinogenesis
Source: PubMed Central journal article supplement — Technol Cancer Res Treat. 2021 Apr 23;20:15330338211004922. doi: 10.1177/15330338211004922 (PMC8071978; doi:10.1177/15330338211004922), 2021-04-23
Supplement: sj-pdf-1-tct-10.1177_15330338211004922.pdf [file sj-pdf-1-tct-10.1177_15330338211004922.pdf]

### **Survival analysis of 18 core genes in Kaplan Meier-plotter database on cervical squamous cell carcinoma**

An online tool Kaplan Meier-plotter was utilized to dig up the prognostic value of **the** 18 selected hub genes on cervical squamous cell carcinoma, including *NCAPG*, *BIRC5*, *AURKA*, *CCNA2*, *UBE2C*, *KIF20A*, *CCNB2*, *TOP2A*, *IL1A*, *PLAU*, *POSTN*, *IGF1*, *MMP1*, *CXCL12*, *VEGF*, *MMP3*, *DCN*, *ANG*. It was demonstrated that 9 of the 18 genes showed significant prognostic value on cervical squamous cell carcinoma. (Figure 1S).

### **Survival analysis of 4 hub genes (*IGF1*, *BIRC5*, *VEGF*, *MMP1*) in VSCC clinical samples.**

We have performed follow-up and survival analysis in the study: among the 55 samples, 14 were missing. Among the other 41 cases, 10 died and 31 survived. Kaplan Meier-plotter survival analysis showed that the 4 genes had insignificant prognostic value on VSCC, which may be due to the insufficient sample size and the short follow-up time of some cases. The results we showed in supplement information. (Figure 2S)
